# Supplementary material for: Rapid tsunami force prediction by mode-decomposition-based surrogate modeling
Source: Copernicus journal article supplement (doi:10.5194/nhess-22-1267-2022), 2022-04-11
Supplement: Supplementary file 1 [file nhess-22-1267-2022-supplement.zip]

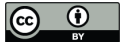

*Supplement of*

## **Rapid tsunami force prediction by mode-decomposition-based surrogate modeling**

**Kenta Tozato et al.**

*Correspondence to:* Shuji Moriguchi (s\_mori@irides.tohoku.ac.jp)

- nhess-22-1267-2022-supplement-title-page.pdf
- animations
  - 2d\_simulation\_S3R5.wmv
  - 3d\_simulation\_S3R5.mp4

The copyright of individual parts of the supplement might differ from the article licence.
